# Supplementary material
Source: PubMed Central journal article supplement (PMC5858717)
Supplement: NIHMS917581-supplement.pdf [file NIHMS917581-supplement.pdf]

**Supplemental Table 1 - Antioxidant supplement content and percent change over an 18-month period**

---

| Antioxidant                          | March 2008 | September 2009 | Change (%) |
|--------------------------------------|------------|----------------|------------|
| Selenium ( $\mu\text{g/g}$ )         | 99         | 137            | +39        |
| Vitamin C ( $\text{mg/g}$ )          | 102        | 96             | -6         |
| Total tocopherols ( $\text{mg/g}$ )  | 15         | 11             | -23        |
| Alpha-tocopherol ( $\text{mg/g}$ )   | 11         | 8              | -30        |
| Beta-tocopherol ( $\text{mg/g}$ )    | 0.035      | 0.040          | +14        |
| Gamma-tocopherol ( $\text{mg/g}$ )   | 2.9        | 3.0            | +1         |
| Delta-tocopherol ( $\text{mg/g}$ )   | 0.7        | 0.6            | -14        |
| Total carotenoids                    | 9.5        | 7.1            | -25        |
| Beta-carotene ( $\text{mg/g}$ )      | 9.0        | 6.8            | -25        |
| Alpha-carotene ( $\text{mg/g}$ )     | 0.5        | 0.3            | -39        |
| Zeaxanthin ( $\text{mg/g}$ )         | 0.07       | 0.06           | -9         |
| Lutein ( $\text{mg/g}$ )             | negligible | negligible     | n/a        |
| Beta-criptoxanthin ( $\text{mg/g}$ ) | negligible | negligible     | n/a        |
| Lycopene ( $\text{mg/g}$ )           | negligible | negligible     | n/a        |
